# Supplementary material
Source: publisher site journal article supplement (http://kjim.org/upload/media/kjim-2022-401-Supplementary-Fig-4.pdf)
Supplement: Supplementary file 1 [file kjim-2022-401-Supplementary-Fig-4.pdf]

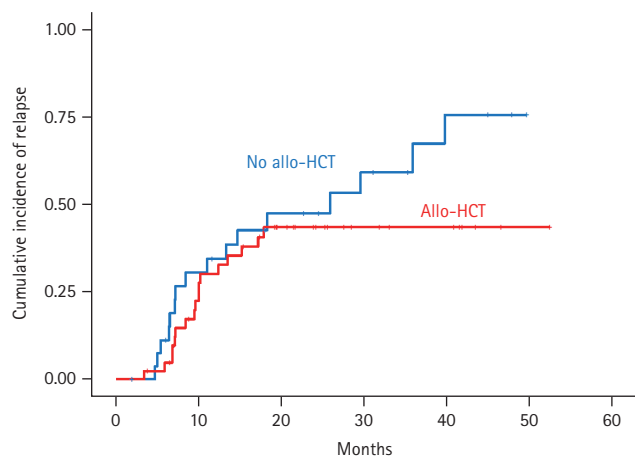

**Supplementary Figure 4.** Cumulative incidence of relapse. Patients who underwent allogeneic hematopoietic cell transplantation (allo-HCT) tended to experience a lower frequency of recurrence, while those who could not proceed to transplantation experienced continuous disease relapse overtime.
